# Supplementary material for: Significance and implications of FHIT gene expression and promoter hypermethylation in acute lymphoblastic leukemia (ALL)
Source: Discov Oncol. 2024 Apr 8;15:108. doi: 10.1007/s12672-024-00971-9 (PMC11001825; doi:10.1007/s12672-024-00971-9)
Supplement: Supplementary file 1 — Additional file 1. Supplementary Figure. [file 12672_2024_971_MOESM1_ESM.zip]

Archive with 2 entries (2 files):
- New folder/Supplementary_figs.docx
- New folder/Supplementary_Tables (1).docx
